# Supplementary material
Source: HighWire-hosted journal article supplement (https://bmjmedicine.bmj.com/content/suppl/2022/06/13/10.1136.bmjmed-2021-000104)
Supplement: bmjmed-2021-000104supp001_data_supplement.pdf [file bmjmed-2021-000104supp001_data_supplement.pdf]

## SUPPLEMENTAL MATERIAL

Effectiveness of BNT162b2 mRNA, mRNA-1273, and ChAdOx1 nCoV-19 vaccines against severe COVID-19 outcomes in a nationwide mass vaccination setting: a cohort study of 11 million vaccinated adults aged 50 years or older and their controls

Kim Bouillon MD PhD,<sup>1</sup> Bérangère Baricault MSc,<sup>1</sup> Jérémie Botton PharmD PhD,<sup>1,2</sup> Marie-Joëlle Jabagi PharmD PhD,<sup>1</sup> Marion Bertrand MSc,<sup>1</sup> Laura Semenzato,<sup>1</sup> Stéphane Le Vu PharmD PhD,<sup>1</sup> Jérôme Drouin MSc,<sup>1</sup> Rosemary Dray-Spira MD PhD,<sup>1</sup> Alain Weill MD,<sup>1</sup> Mahmoud Zureik MD PhD<sup>1,3</sup>

<sup>1</sup>EPI-PHARE Scientific Interest Group in Epidemiology of Health Products, National Agency for Medicines and Health Products Safety, French National Health Insurance, Saint-Denis, France

<sup>2</sup>Paris-Saclay University, University Paris-Sud, Faculty of Pharmacy, Châtenay-Malabry, France

<sup>3</sup>Paris-Saclay University, University Paris-Sud, Inserm, Anti-Infective Evasion and Pharmacoepidemiology, CESP, Montigny le Bretonneux, France

Corresponding Author:

Prof. Mahmoud Zureik, Director

EPI-PHARE

French National Agency for Medicines and Health Products Safety (ANSM)

143-147 boulevard Anatole France

F-93285 Saint-Denis cedex

E-mail: mahmoud.zureik@ansm.sante.fr

Telephone: +33 (0)1 55 87 33 27

**Table of contents**

|                                                                                                                                                                                                                         |    |
|-------------------------------------------------------------------------------------------------------------------------------------------------------------------------------------------------------------------------|----|
| Table 1. Definition of covariables.....                                                                                                                                                                                 | 3  |
| Table 2. Demographic and clinical characteristics of vaccinated individuals by BNT162b2 mRNA vaccine and unvaccinated controls at baseline.....                                                                         | 6  |
| Table 3. Demographic and clinical characteristics of vaccinated individuals by mRNA-1273 vaccine and unvaccinated controls at baseline.....                                                                             | 9  |
| Table 4. Demographic and clinical characteristics of vaccinated individuals by ChAdOx1 nCoV-19 vaccine and unvaccinated controls at baseline.....                                                                       | 12 |
| Table 5. Description of vaccine products for the first and second doses.....                                                                                                                                            | 15 |
| Table 6. Two-dose vaccine effectiveness against COVID-19-related hospitalisation after excluding individuals who received different vaccine products between the first and second doses and their matched controls..... | 16 |
| Table 7. Two-dose vaccine effectiveness against COVID-19-related hospitalisation by age categories ...                                                                                                                  | 17 |
| Table 8. Two-dose vaccine effectiveness against COVID-19-related hospitalisation by sex .....                                                                                                                           | 19 |
| Figure 1. Surveillance of SARS-CoV-2 variants in France.....                                                                                                                                                            | 20 |

**Table 1. Definition of covariables**

Most covariables were defined based on ICD-10 codes and codes used for drugs.

- ICD-10 codes: any occurrence in 5 years prior to 2021 is used.
- ATC/CIP7/CIP13/UCD7/UCD13 codes (for drugs): having 3 dispensings or 2 when at least one concerned the dispensing of a large pack size) in the year 2020 is used.

Other codes were also detailed:

- o CCAM (*classification commune des actes médicaux*) for medical procedures
- o LPP (*liste des produits et prestations*) for medical devices or equipment
- o NABM (*nomenclature des actes de biologie médicale*) for medical biology laboratory
- o *Nature de prestations* for primary care delivery
- o LOINC (logical observation identifiers names and codes) for SARS-CoV-2 tests
- o GHM (groupe homogène de malade) for hospital stays, a French version of diagnosis-related groups

Further details are available in a published article (Rachas et al, medRxiv, 2020) and upon request.

| Covariates                                                | Codes                                                                                                                                                                                                                                                                                                                                                                                                                                                                 |
|-----------------------------------------------------------|-----------------------------------------------------------------------------------------------------------------------------------------------------------------------------------------------------------------------------------------------------------------------------------------------------------------------------------------------------------------------------------------------------------------------------------------------------------------------|
| <b>History of positive SARS-CoV-2</b>                     |                                                                                                                                                                                                                                                                                                                                                                                                                                                                       |
| <u>SARS-CoV-2 test results</u><br>LOINC                   | Reverse transcription PCR: 94309-2, 94500-6, 94845-5<br>Antigen: 94558-4<br>Antibody: 94507-1, 94508-9, 94563-4, 94564-2, 94762-2                                                                                                                                                                                                                                                                                                                                     |
| <u>COVID-19-related hospitalization</u><br>ICD-10         | U07.10 (COVID-19, respiratory form, virus identified), U07.11 (COVID-19, respiratory form, virus not identified), U07.14 (COVID-19, other clinical forms, virus identified), U07.15 (COVID-19, other clinical forms, virus not identified), U04.9 (severe acute respiratory syndrome) and exclusion of hospital stays with following GHM: iterative treatments (dialysis, chemotherapy, radiotherapy, immunotherapy), obstetrics, diseases of childhood and neonates. |
| <b>Frailty*</b><br>Primary care delivery<br>LPP<br>ICD-10 | Having one of the following items:<br>- ≥150 days with nursing care acts<br>- oral or parenteral nutrition (LPP)<br>- oxygen at home (LPP)<br>- anti-decubitus equipment at home (LPP)<br>- nursing home bed (LPP)<br>- wheelchair (LPP)<br>- ICD-10: E43, E44.0, R29.6, G81, G82, G83, R26.2, R26.30, Z74, R15, R32, L89, M80                                                                                                                                        |
| <b>Alcohol-related conditions</b><br>ICD-10               | E24.4, E51.2, F10, G31.2, G62.1, G72.1, I42.6, K29.2, K70, K86.0, R78.0, T51, X45, X65, Y15, Y90, Y91, Y57.3, Z50.2, Z71.4, or Z72.1                                                                                                                                                                                                                                                                                                                                  |
| ATC                                                       | N07BB01, N07BB03, N07BB04, N07BB05 at least 2 dispensings in the 5 years preceding 2021.<br>M03BX01 (baclofen) without following neurological disease (ICD-10): C70, C71, C79.3, C79.4, D32, D33, D42, D43, G04, G05, G06, G09, G12, G13, G24, G25, G26, G31, G32, G35, G36, G37, G46, G80, G81, G82, G83, G91, G93, G95                                                                                                                                              |
| Laboratory test (NABM)                                    | 516, 517, 519 (gamma-GT)                                                                                                                                                                                                                                                                                                                                                                                                                                              |
| <b>Cardiovascular risk factors</b>                        |                                                                                                                                                                                                                                                                                                                                                                                                                                                                       |
| <b>Smoking-related conditions</b>                         |                                                                                                                                                                                                                                                                                                                                                                                                                                                                       |
| ICD-10                                                    | Z716 F17 T652 Z720                                                                                                                                                                                                                                                                                                                                                                                                                                                    |
| ATC                                                       | N07BA                                                                                                                                                                                                                                                                                                                                                                                                                                                                 |
| Primary care delivery                                     | Tobacco consultation service (9566, 9526, 9527) in the 5 years preceding 2021 (at least once)                                                                                                                                                                                                                                                                                                                                                                         |
| <b>Hypertension</b>                                       |                                                                                                                                                                                                                                                                                                                                                                                                                                                                       |
| ATC                                                       | C02AB02, C02AC01, C02AC02, C02AC05, C02AC06, C02CA01, C02CA06, C02DC01, C02LA01, C03AA01, C03AA03, C03BA04, C03BA10, C03BA11, C03BX03, C03CA01, C03CA02, C03CA03, C03DA01, C03DB01, C03EA, C03EA01, C03EA04, C07AA02, C07AA03, C07AA05, C07AA06, C07AA12, C07AA15, C07AA16, C07AA23, C07AB02, C07AB03, C07AB04, C07AB05, C07AB07, C07AB08, C07AB12, C07AG01, C07BA02, C07BB02, C07BB03,                                                                               |

| Covariates                                                                                                            | Codes                                                                                                                                                                                                                                                                                                                                                                                                                                                                                                                                                                                                   |
|-----------------------------------------------------------------------------------------------------------------------|---------------------------------------------------------------------------------------------------------------------------------------------------------------------------------------------------------------------------------------------------------------------------------------------------------------------------------------------------------------------------------------------------------------------------------------------------------------------------------------------------------------------------------------------------------------------------------------------------------|
|                                                                                                                       | C07BB07, C07BB12, C07CA03, C07DA06, C07FB02, C07FB03, C08CA01, C08CA02, C08CA03, C08CA04, C08CA05, C08CA08, C08CA09, C08CA11, C08CA13, C08CX01, C08DA01, C08DB01, C08GA02, C09AA01, C09AA02, C09AA03, C09AA04, C09AA05, C09AA06, C09AA07, C09AA08, C09AA09, C09AA10, C09AA13, C09AA15, C09AA16, C09BA01, C09BA02, C09BA03, C09BA04, C09BA05, C09BA06, C09BA07, C09BA09, C09BA15, C09BB02, C09BB04, C09BB10, C09BX02, C09CA01, C09CA02, C09CA03, C09CA04, C09CA06, C09CA07, C09CA08, C09DA01, C09DA02, C09DA03, C09DA04, C09DA06, C09DA07, C09DA08, C09DB01, C09DB02, C09DB04, C09XA02, C09XA52, C10BX03 |
| Diabetes mellitus                                                                                                     |                                                                                                                                                                                                                                                                                                                                                                                                                                                                                                                                                                                                         |
| ICD-10                                                                                                                | E10, E11, E12, E13, E14<br>G59.0, G63.2, G73.0, G99.0, H28.0, H36.0, I79.2, L97, M14.2, M14.6, N08.3                                                                                                                                                                                                                                                                                                                                                                                                                                                                                                    |
| ATC                                                                                                                   | A10 excluding benfluorex (A10BX06)                                                                                                                                                                                                                                                                                                                                                                                                                                                                                                                                                                      |
| Dyslipidemia                                                                                                          |                                                                                                                                                                                                                                                                                                                                                                                                                                                                                                                                                                                                         |
| ICD-10                                                                                                                | E78                                                                                                                                                                                                                                                                                                                                                                                                                                                                                                                                                                                                     |
| ATC                                                                                                                   | C10                                                                                                                                                                                                                                                                                                                                                                                                                                                                                                                                                                                                     |
| Obesity-related conditions                                                                                            |                                                                                                                                                                                                                                                                                                                                                                                                                                                                                                                                                                                                         |
| ICD-10                                                                                                                | E66 excluding E66.03, E66.13, E66.83, E66.93 (since 2006)                                                                                                                                                                                                                                                                                                                                                                                                                                                                                                                                               |
| CCAM                                                                                                                  | HFCA001, HFCC003, HFFA001, HFFA011, HFFC004, HFFC018, HFGC900, HFKA001, HFKA002, HFKC001, HFLC900, HFLE002, HFMA009, HFMA010, HFMA011, HFMC006, HFMC007, HFMC008, HGCA009, HGCC027 (bariatric surgery)                                                                                                                                                                                                                                                                                                                                                                                                  |
| <b>Cardiovascular diseases</b>                                                                                        |                                                                                                                                                                                                                                                                                                                                                                                                                                                                                                                                                                                                         |
| Acute or chronic coronary artery disease                                                                              |                                                                                                                                                                                                                                                                                                                                                                                                                                                                                                                                                                                                         |
| ICD-10                                                                                                                | I20, I21, I22, I23, I24, I25                                                                                                                                                                                                                                                                                                                                                                                                                                                                                                                                                                            |
| Heart failure                                                                                                         |                                                                                                                                                                                                                                                                                                                                                                                                                                                                                                                                                                                                         |
| ICD-10                                                                                                                | I50, I11.0, I13.0, I13.2, I13.9, K76.1, J81<br>I50, I11, I13 only for those included in the list of long-term diseases                                                                                                                                                                                                                                                                                                                                                                                                                                                                                  |
| Cardiac rhythm disorder                                                                                               |                                                                                                                                                                                                                                                                                                                                                                                                                                                                                                                                                                                                         |
| ICD-10                                                                                                                | I44, I45, I47-I49                                                                                                                                                                                                                                                                                                                                                                                                                                                                                                                                                                                       |
| Valvular heart disease                                                                                                |                                                                                                                                                                                                                                                                                                                                                                                                                                                                                                                                                                                                         |
| ICD-10                                                                                                                | I05-I08, I34-I39                                                                                                                                                                                                                                                                                                                                                                                                                                                                                                                                                                                        |
| Occlusive peripheral arterial disease                                                                                 |                                                                                                                                                                                                                                                                                                                                                                                                                                                                                                                                                                                                         |
| ICD-10                                                                                                                | I70.2, I73.9, I74.0, I74.3, I74.4, I74.5<br>I70, I73, I74 only for those included in the list of long-term diseases                                                                                                                                                                                                                                                                                                                                                                                                                                                                                     |
| Stroke                                                                                                                |                                                                                                                                                                                                                                                                                                                                                                                                                                                                                                                                                                                                         |
| ICD-10                                                                                                                | I60-I64, I67-I69                                                                                                                                                                                                                                                                                                                                                                                                                                                                                                                                                                                        |
| Pulmonary embolism                                                                                                    |                                                                                                                                                                                                                                                                                                                                                                                                                                                                                                                                                                                                         |
| ICD-10                                                                                                                | I26                                                                                                                                                                                                                                                                                                                                                                                                                                                                                                                                                                                                     |
| <b>Chronic respiratory conditions</b>                                                                                 |                                                                                                                                                                                                                                                                                                                                                                                                                                                                                                                                                                                                         |
| ICD-10                                                                                                                | J40, J41, J42, J43, J44, J45, J46, J47, J96 (excluding J96.0, J96.9), J98                                                                                                                                                                                                                                                                                                                                                                                                                                                                                                                               |
| ATC                                                                                                                   | R03 (drugs for obstructive airway diseases)                                                                                                                                                                                                                                                                                                                                                                                                                                                                                                                                                             |
| <b>Dialysis</b>                                                                                                       |                                                                                                                                                                                                                                                                                                                                                                                                                                                                                                                                                                                                         |
| ICD-10                                                                                                                | N18 (long-term diseases), Z940                                                                                                                                                                                                                                                                                                                                                                                                                                                                                                                                                                          |
| CCAM                                                                                                                  | JAEA003, HNEA002<br>JVJB001, JVJF004, JVJF008, JVRP004, JVRP007, JVRP008, YYYY007                                                                                                                                                                                                                                                                                                                                                                                                                                                                                                                       |
| GHM                                                                                                                   | 27C06, 24M39Z, 11M17<br>11K02, 28Z01-28Z04                                                                                                                                                                                                                                                                                                                                                                                                                                                                                                                                                              |
| Billing code for dialysis session conducted at home, self-care dialysis, in a dialysis unit under medical supervision | D11-D16, D20-24                                                                                                                                                                                                                                                                                                                                                                                                                                                                                                                                                                                         |
| <b>Kidney transplant</b>                                                                                              |                                                                                                                                                                                                                                                                                                                                                                                                                                                                                                                                                                                                         |
| ICD-10                                                                                                                | Z940                                                                                                                                                                                                                                                                                                                                                                                                                                                                                                                                                                                                    |
| CCAM                                                                                                                  | JAEA003, HNEA002                                                                                                                                                                                                                                                                                                                                                                                                                                                                                                                                                                                        |
| ATC                                                                                                                   | L04AA06, L04AA10, L04AA18, L04AD01, L04AD02, L04AX01                                                                                                                                                                                                                                                                                                                                                                                                                                                                                                                                                    |
| GHM                                                                                                                   | 27C06Z, 27C061, 27C062, 27C063, 27C064, 24M39Z, 11M171, 11M172, 11M173, 11M174                                                                                                                                                                                                                                                                                                                                                                                                                                                                                                                          |
| <b>Liver failure</b>                                                                                                  |                                                                                                                                                                                                                                                                                                                                                                                                                                                                                                                                                                                                         |
| ICD-10                                                                                                                | B18, I85, K70 to K76, Z94.4                                                                                                                                                                                                                                                                                                                                                                                                                                                                                                                                                                             |
| ATC/CIP7/CIP13/UCD7/UCD13<br>NABM<br>CCAM                                                                             | Having one of the following items:<br>- 3 reimbursements of a specific treatment for chronic hepatitis B:<br>o ATC: J05AF08, J05AF10, J05AF11                                                                                                                                                                                                                                                                                                                                                                                                                                                           |

| Covariates                       | Codes                                                                                                                                                                                                                                                                                                                                                                                                                                                                                                                                                                                                                                                                                                                                                                                                     |
|----------------------------------|-----------------------------------------------------------------------------------------------------------------------------------------------------------------------------------------------------------------------------------------------------------------------------------------------------------------------------------------------------------------------------------------------------------------------------------------------------------------------------------------------------------------------------------------------------------------------------------------------------------------------------------------------------------------------------------------------------------------------------------------------------------------------------------------------------------|
|                                  | <ul style="list-style-type: none"> <li>○ UCD7: 9212525, 9212531</li> <li>○ CIP7: 3519671, 3519694</li> <li>- 1 reimbursement on the same date of (L03AB05, L03AB09, L03AB10, L03AB11) and J05AB04</li> <li>- 1 reimbursement of a direct-acting antiviral against hepatitis C virus (HCV) (J05AE11, J05AE12, J05AE14, J05AP08, J05AP51, J05AP55, J05AP56, J05AX14, J05AX15, J05AX16, J05AX65, J05AX67, J05AX68, J05AX (CIP13: 3400930108765, UCD13: 3400894287391))</li> <li>- 1 reimbursement of HCV genotyping (4125)</li> <li>- 3 reimbursements of quantitative HCV RNA PCR (4124)</li> <li>- 2 reimbursements of an assessment of liver fibrosis <ul style="list-style-type: none"> <li>○ NABM: 1000, 1001, 1002</li> <li>○ CCAM: HLQM002, HLHB001, HLHH001, HLHH005, HLHJ003</li> </ul> </li> </ul> |
| Active cancer (in 2019 and 2020) |                                                                                                                                                                                                                                                                                                                                                                                                                                                                                                                                                                                                                                                                                                                                                                                                           |
| ICD-10                           | C00-D09<br>Z08, Z51.0, Z51.1                                                                                                                                                                                                                                                                                                                                                                                                                                                                                                                                                                                                                                                                                                                                                                              |
| Depression                       |                                                                                                                                                                                                                                                                                                                                                                                                                                                                                                                                                                                                                                                                                                                                                                                                           |
| ICD-10                           | F30-F34, F38-F45, F48                                                                                                                                                                                                                                                                                                                                                                                                                                                                                                                                                                                                                                                                                                                                                                                     |
| ATC/CIP13                        | N06A (excluding CIP13 3400933338022), N05AN01, N03AG02<br>CIP13: 3400934876233, 3400934876691, 340093544427                                                                                                                                                                                                                                                                                                                                                                                                                                                                                                                                                                                                                                                                                               |
| Psychosis                        |                                                                                                                                                                                                                                                                                                                                                                                                                                                                                                                                                                                                                                                                                                                                                                                                           |
| ICD-10                           | F20 to F25, F28, F29                                                                                                                                                                                                                                                                                                                                                                                                                                                                                                                                                                                                                                                                                                                                                                                      |
| ATC/CIP13                        | N05A (excluding N05AN01, N05AL06, 3400932896332 (CIP13))                                                                                                                                                                                                                                                                                                                                                                                                                                                                                                                                                                                                                                                                                                                                                  |
| Dementia                         |                                                                                                                                                                                                                                                                                                                                                                                                                                                                                                                                                                                                                                                                                                                                                                                                           |
| ICD-10                           | F00, F01, F02, F03, F05.1, G30                                                                                                                                                                                                                                                                                                                                                                                                                                                                                                                                                                                                                                                                                                                                                                            |
| ATC                              | N06DA04, N06DX01                                                                                                                                                                                                                                                                                                                                                                                                                                                                                                                                                                                                                                                                                                                                                                                          |
| Epilepsy                         |                                                                                                                                                                                                                                                                                                                                                                                                                                                                                                                                                                                                                                                                                                                                                                                                           |
| ICD-10                           | G40, G41                                                                                                                                                                                                                                                                                                                                                                                                                                                                                                                                                                                                                                                                                                                                                                                                  |
| Parkinson's disease              |                                                                                                                                                                                                                                                                                                                                                                                                                                                                                                                                                                                                                                                                                                                                                                                                           |
| ICD-10                           | G20, F02.3                                                                                                                                                                                                                                                                                                                                                                                                                                                                                                                                                                                                                                                                                                                                                                                                |
| ATC/CIP13                        | 34009333284398 (CIP13), N04BA02, N04BA03, N04BC01, N04BC02, N04BC04, N04BC07, N04BD01, N04BD02, N04BX01, N04BX02 (excluding the following CIP7: 3644494, 3644502, 3644525, 3644548, 3914841, 3918394, 3918402, 3918425, 3918448, 3927163, 3927217, 3927269, 39227 298, 3933442, 3933502, 3933583, 3933637, 3935079, 3935263, 3935346 , 3005943)                                                                                                                                                                                                                                                                                                                                                                                                                                                           |
| Inflammatory bowel disease       |                                                                                                                                                                                                                                                                                                                                                                                                                                                                                                                                                                                                                                                                                                                                                                                                           |
| ICD-10                           | K50, K51, M07.4, M07.5                                                                                                                                                                                                                                                                                                                                                                                                                                                                                                                                                                                                                                                                                                                                                                                    |
| Rheumatoid arthritis             |                                                                                                                                                                                                                                                                                                                                                                                                                                                                                                                                                                                                                                                                                                                                                                                                           |
| ICD-10                           | M06, M06, M08 (excluding M08.1), M09                                                                                                                                                                                                                                                                                                                                                                                                                                                                                                                                                                                                                                                                                                                                                                      |
| Ankylosing spondylitis           |                                                                                                                                                                                                                                                                                                                                                                                                                                                                                                                                                                                                                                                                                                                                                                                                           |
| ICD-10                           | M07 (excluding M07.4, M07.5), M08.1, M45, M46                                                                                                                                                                                                                                                                                                                                                                                                                                                                                                                                                                                                                                                                                                                                                             |

\*Frailty variable was created using the SNDS following published recommendations (Faurot KR et al, Pharmacoepidemiol Drug Saf, 2015; Kim et al, Pharmacoepidemiol Drug Saf, 2014) and was firstly applied in a study on the association between vitamin K agonists and myelodysplastic syndrome (Neumann et al, Blood, 2021).

**Table 2. Demographic and clinical characteristics of vaccinated individuals by BNT162b2 mRNA vaccine and unvaccinated controls at baseline**

|                                      |                             | BNT162b2 vaccine      |                        | Standardized difference |
|--------------------------------------|-----------------------------|-----------------------|------------------------|-------------------------|
|                                      |                             | No<br>(n = 7,161,658) | Yes<br>(n = 7,161,658) |                         |
| <b>Matching variables</b>            |                             |                       |                        |                         |
| Age (years)                          | Mean (SD)                   | 72.70 (11.00)         | 72.70 (11.00)          | 0.00000                 |
| Age categories                       | 50-54                       | 377,325 (5.3)         | 377,325 (5.3)          |                         |
|                                      | 55-59                       | 537,178 (7.5)         | 537,178 (7.5)          |                         |
|                                      | 60-64                       | 846,820 (11.8)        | 846,820 (11.8)         |                         |
|                                      | 65-69                       | 1,049,776 (14.7)      | 1,049,776 (14.7)       |                         |
|                                      | 70-74                       | 1,347,207 (18.8)      | 1,347,207 (18.8)       |                         |
|                                      | 75-79                       | 978,840 (13.7)        | 978,840 (13.7)         |                         |
|                                      | 80-84                       | 856,384 (12.0)        | 856,384 (12.0)         |                         |
|                                      | 85-89                       | 669,000 (9.3)         | 669,000 (9.3)          |                         |
|                                      | 90 or more                  | 499,128 (7.0)         | 499,128 (7.0)          |                         |
| Sex                                  | Men                         | 3,046,267 (42.5)      | 3,046,267 (42.5)       | 0.00000                 |
|                                      | Women                       | 4,115,391 (57.5)      | 4,115,391 (57.5)       |                         |
| Residence area                       | Auvergne-Rhône-Alpes        | 841,801 (11.8)        | 841,801 (11.8)         | 0.00000                 |
|                                      | Bourgogne-Franche-Comté     | 281,988 (3.9)         | 281,988 (3.9)          |                         |
|                                      | Bretagne                    | 391,114 (5.5)         | 391,114 (5.5)          |                         |
|                                      | Centre-Val de Loire         | 296,583 (4.1)         | 296,583 (4.1)          |                         |
|                                      | Corse                       | 54,351 (0.8)          | 54,351 (0.8)           |                         |
|                                      | Grand Est                   | 589,212 (8.2)         | 589,212 (8.2)          |                         |
|                                      | Hauts-de-France             | 577,660 (8.1)         | 577,660 (8.1)          |                         |
|                                      | Ile-de-France               | 1,082,060 (15.1)      | 1,082,060 (15.1)       |                         |
|                                      | Normandie                   | 367,197 (5.1)         | 367,197 (5.1)          |                         |
|                                      | Nouvelle-Aquitaine          | 738,685 (10.3)        | 738,685 (10.3)         |                         |
|                                      | Occitanie                   | 745,627 (10.4)        | 745,627 (10.4)         |                         |
|                                      | Overseas departments        | 107,312 (1.5)         | 107,312 (1.5)          |                         |
|                                      | Pays de la Loire            | 418,607 (5.8)         | 418,607 (5.8)          |                         |
|                                      | Provence-Alpes-Côte d'Azur  | 669,461 (9.3)         | 669,461 (9.3)          |                         |
| Nursing home                         | No                          | 6,973,945 (97.4)      | 6,973,945 (97.4)       | 0.00000                 |
|                                      | Yes, w/ inpatient pharmacy  | 30,819 (0.4)          | 30,819 (0.4)           |                         |
|                                      | Yes, w/o inpatient pharmacy | 156,894 (2.2)         | 156,894 (2.2)          |                         |
| Social deprivation index (quintiles) | 1 (least deprived)          | 1,257,486 (17.6)      | 1,489,831 (20.8)       | 0.12028                 |
|                                      | 2                           | 1,321,002 (18.4)      | 1,375,859 (19.2)       |                         |
|                                      | 3                           | 1,449,205 (20.2)      | 1,428,226 (19.9)       |                         |
|                                      | 4                           | 1,500,897 (21.0)      | 1,409,661 (19.7)       |                         |
|                                      | 5 (most deprived)           | 1,460,106 (20.4)      | 1,281,541 (17.9)       |                         |
|                                      | Unknown                     | 172,962 (2.4)         | 176,540 (2.4)          |                         |

|                                                                  |     | <b>BNT162b2 vaccine</b> |                        | Standardized difference |
|------------------------------------------------------------------|-----|-------------------------|------------------------|-------------------------|
|                                                                  |     | No<br>(n = 7,161,658)   | Yes<br>(n = 7,161,658) |                         |
| History of COVID-19 status<br>(hospitalisation, screening tests) | No  | 6,794,490 (94.9)        | 6,967,402 (97.3)       | -0.12466                |
|                                                                  | Yes | 367,168 (5.1)           | 194,256 (2.7)          |                         |
| Influenza vaccines in 2018 or 2019                               | No  | 5,049,840 (70.5)        | 4,109,101 (57.4)       | 0.27617                 |
|                                                                  | Yes | 2,111,818 (29.5)        | 3,052,557 (42.6)       |                         |
| Frailty                                                          | No  | 6,489,092 (90.6)        | 6,584,152 (91.9)       | -0.04704                |
|                                                                  | Yes | 672,566 (9.4)           | 577,506 (8.1)          |                         |
| Alcohol-related conditions                                       | No  | 7,070,172 (98.7)        | 7,093,321 (99.0)       | -0.03078                |
|                                                                  | Yes | 91,486 (1.3)            | 68,337 (1.0)           |                         |
| <b>Cardiovascular risk factors</b>                               |     |                         |                        |                         |
| Smoking-related conditions                                       | No  | 6,885,184 (96.1)        | 6,873,641 (96.0)       | 0.00828                 |
|                                                                  | Yes | 276,474 (3.9)           | 288,017 (4.0)          |                         |
| Hypertension                                                     | No  | 3,752,796 (52.4)        | 3,489,021 (48.7)       | 0.07372                 |
|                                                                  | Yes | 3,408,862 (47.6)        | 3,672,637 (51.3)       |                         |
| Diabetes mellitus                                                | No  | 6,126,084 (85.5)        | 6,144,454 (85.8)       | -0.00732                |
|                                                                  | Yes | 1,035,574 (14.5)        | 1,017,204 (14.2)       |                         |
| Dyslipidemia                                                     | No  | 5,260,844 (73.5)        | 4,947,355 (69.1)       | 0.09685                 |
|                                                                  | Yes | 1,900,814 (26.5)        | 2,214,303 (30.9)       |                         |
| Obesity-related conditions                                       | No  | 7,072,347 (98.8)        | 7,053,734 (98.5)       | 0.02230                 |
|                                                                  | Yes | 89,311 (1.2)            | 107,924 (1.5)          |                         |
| <b>Cardiovascular diseases</b>                                   |     |                         |                        |                         |
| Coronary heart disease                                           | No  | 6,587,791 (92.0)        | 6,495,636 (90.7)       | 0.04577                 |
|                                                                  | Yes | 573,867 (8.0)           | 666,022 (9.3)          |                         |
| Heart failure                                                    | No  | 6,907,936 (96.5)        | 6,934,751 (96.8)       | -0.02079                |
|                                                                  | Yes | 253,722 (3.5)           | 226,907 (3.2)          |                         |
| Cardiac rhythm disorder                                          | No  | 6,625,907 (92.5)        | 6,589,096 (92.0)       | 0.01924                 |
|                                                                  | Yes | 535,751 (7.5)           | 572,562 (8.0)          |                         |
| Valvular heart disease                                           | No  | 6,953,191 (97.1)        | 6,932,388 (96.8)       | 0.01688                 |
|                                                                  | Yes | 208,467 (2.9)           | 229,270 (3.2)          |                         |
| Occlusive peripheral arterial disease                            | No  | 6,963,110 (97.2)        | 6,964,812 (97.3)       | -0.00145                |
|                                                                  | Yes | 198,548 (2.8)           | 196,846 (2.7)          |                         |

|                                |     | BNT162b2 vaccine      |                        | Standardized difference |
|--------------------------------|-----|-----------------------|------------------------|-------------------------|
|                                |     | No<br>(n = 7,161,658) | Yes<br>(n = 7,161,658) |                         |
| Stroke                         | No  | 6,896,241 (96.3)      | 6,902,632 (96.4)       | -0.00475                |
|                                | Yes | 265,417 (3.7)         | 259,026 (3.6)          |                         |
| Pulmonary embolism             | No  | 7,120,381 (99.4)      | 7,115,603 (99.4)       | 0.00857                 |
|                                | Yes | 41,277 (0.6)          | 46,055 (0.6)           |                         |
| <b>Other comorbidities</b>     |     |                       |                        |                         |
| Chronic respiratory conditions | No  | 6,545,415 (91.4)      | 6,491,622 (90.6)       | 0.02627                 |
|                                | Yes | 616,243 (8.6)         | 670,036 (9.4)          |                         |
| Dialysis                       | No  | 7,154,269 (99.9)      | 7,141,004 (99.7)       | 0.04191                 |
|                                | Yes | 7,389 (0.1)           | 20,654 (0.3)           |                         |
| Kidney transplant              | No  | 7,157,321 (99.9)      | 7,147,617 (99.8)       | 0.03786                 |
|                                | Yes | 4,337 (0.1)           | 14,041 (0.2)           |                         |
| Liver failure                  | No  | 7,089,901 (99.0)      | 7,085,471 (98.9)       | 0.00612                 |
|                                | Yes | 71,757 (1.0)          | 76,187 (1.1)           |                         |
| Active cancer                  | No  | 6,844,908 (95.6)      | 6,737,753 (94.1)       | 0.06761                 |
|                                | Yes | 316,750 (4.4)         | 423,905 (5.9)          |                         |
| Depression                     | No  | 6,299,613 (88.0)      | 6,235,680 (87.1)       | 0.02701                 |
|                                | Yes | 862,045 (12.0)        | 925,978 (12.9)         |                         |
| Psychosis                      | No  | 7,035,499 (98.2)      | 7,052,876 (98.5)       | -0.01910                |
|                                | Yes | 126,159 (1.8)         | 108,782 (1.5)          |                         |
| Dementia                       | No  | 6,919,652 (96.6)      | 6,945,372 (97.0)       | -0.02041                |
|                                | Yes | 242,006 (3.4)         | 216,286 (3.0)          |                         |
| Epilepsy                       | No  | 7,116,180 (99.4)      | 7,118,810 (99.4)       | -0.00469                |
|                                | Yes | 45,478 (0.6)          | 42,848 (0.6)           |                         |
| Parkinson's disease            | No  | 7,073,499 (98.8)      | 7,071,416 (98.7)       | 0.00262                 |
|                                | Yes | 88,159 (1.2)          | 90,242 (1.3)           |                         |
| Inflammatory bowel disease     | No  | 7,131,749 (99.6)      | 7,119,801 (99.4)       | 0.02363                 |
|                                | Yes | 29,909 (0.4)          | 41,857 (0.6)           |                         |
| Rheumatoid arthritis           | No  | 7,091,302 (99.0)      | 7,075,693 (98.8)       | 0.02098                 |
|                                | Yes | 70,356 (1.0)          | 85,965 (1.2)           |                         |
| Ankylosing spondylitis         | No  | 7,131,515 (99.6)      | 7,118,103 (99.4)       | 0.02618                 |
|                                | Yes | 30,143 (0.4)          | 43,555 (0.6)           |                         |



**Table 3. Demographic and clinical characteristics of vaccinated individuals by mRNA-1273 vaccine and unvaccinated controls at baseline**

|                                      |                             | mRNA-1273 vaccine   |                      | Standardized difference |
|--------------------------------------|-----------------------------|---------------------|----------------------|-------------------------|
|                                      |                             | No<br>(n = 856,599) | Yes<br>(n = 856,599) |                         |
| <b>Matching variables</b>            |                             |                     |                      |                         |
| Age (years)                          | Mean (SD)                   | 71.35 (10.78)       | 71.35 (10.78)        | 0.00000                 |
| Age categories                       | 50-54                       | 55,167 (6.4)        | 55,167 (6.4)         |                         |
|                                      | 55-59                       | 75,542 (8.8)        | 75,542 (8.8)         |                         |
|                                      | 60-64                       | 107,143 (12.5)      | 107,143 (12.5)       |                         |
|                                      | 65-69                       | 132,543 (15.5)      | 132,543 (15.5)       |                         |
|                                      | 70-74                       | 183,281 (21.4)      | 183,281 (21.4)       |                         |
|                                      | 75-79                       | 99,719 (11.6)       | 99,719 (11.6)        |                         |
|                                      | 80-84                       | 88,274 (10.3)       | 88,274 (10.3)        |                         |
|                                      | 85-89                       | 69,720 (8.1)        | 69,720 (8.1)         |                         |
|                                      | 90 or more                  | 45,210 (5.3)        | 45,210 (5.3)         |                         |
| Sex                                  | Men                         | 370,469 (43.2)      | 370,469 (43.2)       | 0.00000                 |
|                                      | Women                       | 486,130 (56.8)      | 486,130 (56.8)       |                         |
| Residence area                       | Auvergne-Rhône-Alpes        | 107,028 (12.5)      | 107,028 (12.5)       | 0.00000                 |
|                                      | Bourgogne-Franche-Comté     | 67,089 (7.8)        | 67,089 (7.8)         |                         |
|                                      | Bretagne                    | 34,373 (4.0)        | 34,373 (4.0)         |                         |
|                                      | Centre-Val de Loire         | 34,651 (4.0)        | 34,651 (4.0)         |                         |
|                                      | Corse                       | 5,480 (0.6)         | 5,480 (0.6)          |                         |
|                                      | Grand Est                   | 85,690 (10.0)       | 85,690 (10.0)        |                         |
|                                      | Hauts-de-France             | 53,838 (6.3)        | 53,838 (6.3)         |                         |
|                                      | Ile-de-France               | 149,954 (17.5)      | 149,954 (17.5)       |                         |
|                                      | Normandie                   | 45,665 (5.3)        | 45,665 (5.3)         |                         |
|                                      | Nouvelle-Aquitaine          | 92,921 (10.8)       | 92,921 (10.8)        |                         |
|                                      | Occitanie                   | 64,099 (7.5)        | 64,099 (7.5)         |                         |
|                                      | Overseas departments        | 152 (0.0)           | 152 (0.0)            |                         |
|                                      | Pays de la Loire            | 31,969 (3.7)        | 31,969 (3.7)         |                         |
| Provence-Alpes-Côte d'Azur           | 83,690 (9.8)                | 83,690 (9.8)        |                      |                         |
| Nursing home                         | No                          | 856,426 (100)       | 856,426 (100)        | 0.00000                 |
|                                      | Yes, w/ inpatient pharmacy  | 29 (0.0)            | 29 (0.0)             |                         |
|                                      | Yes, w/o inpatient pharmacy | 144 (0.0)           | 144 (0.0)            |                         |
| Social deprivation index (quintiles) | 1 (least deprived)          | 160,171 (18.7)      | 189,927 (22.2)       | 0.13181                 |
|                                      | 2                           | 159,929 (18.7)      | 176,113 (20.6)       |                         |
|                                      | 3                           | 173,172 (20.2)      | 175,924 (20.5)       |                         |
|                                      | 4                           | 177,979 (20.8)      | 164,960 (19.3)       |                         |
|                                      | 5 (most deprived)           | 178,409 (20.8)      | 142,471 (16.6)       |                         |
|                                      | Unknown                     | 6,939 (0.8)         | 7,204 (0.8)          |                         |

|                                                                  |     | mRNA-1273 vaccine   |                      | Standardized difference |
|------------------------------------------------------------------|-----|---------------------|----------------------|-------------------------|
|                                                                  |     | No<br>(n = 856,599) | Yes<br>(n = 856,599) |                         |
| History of COVID-19 status<br>(hospitalisation, screening tests) | No  | 814,740 (95.1)      | 834,137 (97.4)       | -0.11933                |
|                                                                  | Yes | 41,859 (4.9)        | 22,462 (2.6)         |                         |
| Influenza vaccines in 2018 or 2019                               | No  | 624,005 (72.8)      | 509,056 (59.4)       | 0.28645                 |
|                                                                  | Yes | 232,594 (27.2)      | 347,543 (40.6)       |                         |
| Frailty                                                          | No  | 786,064 (91.8)      | 792,411 (92.5)       | -0.02753                |
|                                                                  | Yes | 70,535 (8.2)        | 64,188 (7.5)         |                         |
| Alcohol-related conditions                                       | No  | 845,470 (98.7)      | 847,900 (99.0)       | -0.02653                |
|                                                                  | Yes | 11,129 (1.3)        | 8,699 (1.0)          |                         |
| <b>Cardiovascular risk factors</b>                               |     |                     |                      |                         |
| Smoking-related conditions                                       | No  | 821,403 (95.9)      | 819,372 (95.7)       | 0.01178                 |
|                                                                  | Yes | 35,196 (4.1)        | 37,227 (4.3)         |                         |
| Hypertension                                                     | No  | 463,865 (54.2)      | 426,444 (49.8)       | 0.08752                 |
|                                                                  | Yes | 392,734 (45.8)      | 430,155 (50.2)       |                         |
| Diabetes mellitus                                                | No  | 736,501 (86.0)      | 736,214 (85.9)       | 0.00096                 |
|                                                                  | Yes | 120,098 (14.0)      | 120,385 (14.1)       |                         |
| Dyslipidemia                                                     | No  | 633,584 (74.0)      | 593,300 (69.3)       | 0.10445                 |
|                                                                  | Yes | 223,015 (26.0)      | 263,299 (30.7)       |                         |
| Obesity-related conditions                                       | No  | 845,490 (98.7)      | 842,650 (98.4)       | 0.02762                 |
|                                                                  | Yes | 11,109 (1.3)        | 13,949 (1.6)         |                         |
| <b>Cardiovascular diseases</b>                                   |     |                     |                      |                         |
| Coronary heart disease                                           | No  | 791,566 (92.4)      | 779,875 (91.0)       | 0.04956                 |
|                                                                  | Yes | 65,033 (7.6)        | 76,724 (9.0)         |                         |
| Heart failure                                                    | No  | 830,419 (96.9)      | 832,957 (97.2)       | -0.01763                |
|                                                                  | Yes | 26,180 (3.1)        | 23,642 (2.8)         |                         |
| Cardiac rhythm disorder                                          | No  | 799,495 (93.3)      | 794,712 (92.8)       | 0.02196                 |
|                                                                  | Yes | 57,104 (6.7)        | 61,887 (7.2)         |                         |
| Valvular heart disease                                           | No  | 834,614 (97.4)      | 832,135 (97.1)       | 0.01782                 |
|                                                                  | Yes | 21,985 (2.6)        | 24,464 (2.9)         |                         |
| Occlusive peripheral arterial disease                            | No  | 834,530 (97.4)      | 834,086 (97.4)       | 0.00326                 |
|                                                                  | Yes | 22,069 (2.6)        | 22,513 (2.6)         |                         |
| Stroke                                                           | No  | 829,053 (96.8)      | 829,548 (96.8)       | -0.00329                |
|                                                                  | Yes | 27,546 (3.2)        | 27,051 (3.2)         |                         |

|                                |     | mRNA-1273 vaccine   |                      | Standardized difference |
|--------------------------------|-----|---------------------|----------------------|-------------------------|
|                                |     | No<br>(n = 856,599) | Yes<br>(n = 856,599) |                         |
| Pulmonary embolism             | No  | 852,066 (99.5)      | 851,504 (99.4)       | 0.00878                 |
|                                | Yes | 4,533 (0.5)         | 5,095 (0.6)          |                         |
| <b>Other comorbidities</b>     |     |                     |                      |                         |
| Chronic respiratory conditions | No  | 785,035 (91.6)      | 777,945 (90.8)       | 0.02927                 |
|                                | Yes | 71,564 (8.4)        | 78,654 (9.2)         |                         |
| Dialysis                       | No  | 855,875 (99.9)      | 853,520 (99.6)       | 0.05844                 |
|                                | Yes | 724 (0.1)           | 3,079 (0.4)          |                         |
| Kidney transplant              | No  | 856,091 (99.9)      | 854,574 (99.8)       | 0.04610                 |
|                                | Yes | 508 (0.1)           | 2,025 (0.2)          |                         |
| Liver failure                  | No  | 848,032 (99.0)      | 847,291 (98.9)       | 0.00851                 |
|                                | Yes | 8,567 (1.0)         | 9,308 (1.1)          |                         |
| Active cancer                  | No  | 820,682 (95.8)      | 806,380 (94.1)       | 0.07646                 |
|                                | Yes | 35,917 (4.2)        | 50,219 (5.9)         |                         |
| Depression                     | No  | 760,797 (88.8)      | 752,088 (87.8)       | 0.03164                 |
|                                | Yes | 95,802 (11.2)       | 104,511 (12.2)       |                         |
| Psychosis                      | No  | 844,183 (98.6)      | 846,039 (98.8)       | -0.01884                |
|                                | Yes | 12,416 (1.4)        | 10,560 (1.2)         |                         |
| Dementia                       | No  | 838,912 (97.9)      | 843,824 (98.5)       | -0.04340                |
|                                | Yes | 17,687 (2.1)        | 12,775 (1.5)         |                         |
| Epilepsy                       | No  | 851,649 (99.4)      | 851,720 (99.4)       | -0.00110                |
|                                | Yes | 4,950 (0.6)         | 4,879 (0.6)          |                         |
| Parkinson's disease            | No  | 847,775 (99.0)      | 847,400 (98.9)       | 0.00429                 |
|                                | Yes | 8,824 (1.0)         | 9,199 (1.1)          |                         |
| Inflammatory bowel disease     | No  | 852,833 (99.6)      | 851,417 (99.4)       | 0.02293                 |
|                                | Yes | 3,766 (0.4)         | 5,182 (0.6)          |                         |
| Rheumatoid arthritis           | No  | 848,485 (99.1)      | 846,632 (98.8)       | 0.02117                 |
|                                | Yes | 8,114 (0.9)         | 9,967 (1.2)          |                         |
| Ankylosing spondylitis         | No  | 852,848 (99.6)      | 851,370 (99.4)       | 0.02390                 |
|                                | Yes | 3,751 (0.4)         | 5,229 (0.6)          |                         |

**Table 4. Demographic and clinical characteristics of vaccinated individuals by ChAdOx1 nCoV-19 vaccine and unvaccinated controls at baseline**

|                                      |                             | ChAdOx1 nCoV-19 vaccine |                        | Standardized difference |
|--------------------------------------|-----------------------------|-------------------------|------------------------|-------------------------|
|                                      |                             | No<br>(n = 3,238,575)   | Yes<br>(n = 3,238,575) |                         |
| <b>Matching variables</b>            |                             |                         |                        |                         |
| Age (years)                          | Mean (SD)                   | 65.12 (7.55)            | 65.12 (7.55)           | 0.00000                 |
| Age categories                       | 50-54                       | 171,769 (5.3)           | 171,769 (5.3)          |                         |
|                                      | 55-59                       | 643,022 (19.9)          | 643,022 (19.9)         |                         |
|                                      | 60-64                       | 769,338 (23.8)          | 769,338 (23.8)         |                         |
|                                      | 65-69                       | 774,172 (23.9)          | 774,172 (23.9)         |                         |
|                                      | 70-74                       | 684,629 (21.1)          | 684,629 (21.1)         |                         |
|                                      | 75-79                       | 74,189 (2.3)            | 74,189 (2.3)           |                         |
|                                      | 80-84                       | 47,256 (1.5)            | 47,256 (1.5)           |                         |
|                                      | 85-89                       | 40,975 (1.3)            | 40,975 (1.3)           |                         |
|                                      | 90 or more                  | 33,225 (1.0)            | 33,225 (1.0)           |                         |
| Sex                                  | Men                         | 1,659,165 (51.2)        | 1,659,165 (51.2)       | 0.00000                 |
|                                      | Women                       | 1,579,410 (48.8)        | 1,579,410 (48.8)       |                         |
| Residence area                       | Auvergne-Rhône-Alpes        | 384,565 (11.9)          | 384,565 (11.9)         | 0.00000                 |
|                                      | Bourgogne-Franche-Comté     | 139,519 (4.3)           | 139,519 (4.3)          |                         |
|                                      | Bretagne                    | 203,205 (6.3)           | 203,205 (6.3)          |                         |
|                                      | Centre-Val de Loire         | 133,607 (4.1)           | 133,607 (4.1)          |                         |
|                                      | Corse                       | 7,438 (0.2)             | 7,438 (0.2)            |                         |
|                                      | Grand Est                   | 286,427 (8.8)           | 286,427 (8.8)          |                         |
|                                      | Hauts-de-France             | 353,666 (10.9)          | 353,666 (10.9)         |                         |
|                                      | Ile-de-France               | 483,113 (14.9)          | 483,113 (14.9)         |                         |
|                                      | Normandie                   | 184,751 (5.7)           | 184,751 (5.7)          |                         |
|                                      | Nouvelle-Aquitaine          | 346,196 (10.7)          | 346,196 (10.7)         |                         |
|                                      | Occitanie                   | 296,694 (9.2)           | 296,694 (9.2)          |                         |
|                                      | Overseas departments        | 3,943 (0.1)             | 3,943 (0.1)            |                         |
|                                      | Pays de la Loire            | 205,586 (6.3)           | 205,586 (6.3)          |                         |
|                                      | Provence-Alpes-Côte d'Azur  | 209,865 (6.5)           | 209,865 (6.5)          |                         |
| Nursing home                         | No                          | 3,238,572 (100)         | 3,238,572 (100)        | 0.00000                 |
|                                      | Yes, w/o inpatient pharmacy | 3 (0.0)                 | 3 (0.0)                |                         |
| Social deprivation index (quintiles) | 1 (least deprived)          | 572,837 (17.7)          | 686,070 (21.2)         | 0.10128                 |
|                                      | 2                           | 618,182 (19.1)          | 663,072 (20.5)         |                         |
|                                      | 3                           | 651,040 (20.1)          | 654,273 (20.2)         |                         |
|                                      | 4                           | 693,554 (21.4)          | 641,172 (19.8)         |                         |
|                                      | 5 (most deprived)           | 685,683 (21.2)          | 576,992 (17.8)         |                         |
|                                      | Unknown                     | 17,279 (0.5)            | 16,996 (0.5)           |                         |

|                                                                  |     | <b>ChAdOx1 nCoV-19 vaccine</b> |                        | Standardized difference |
|------------------------------------------------------------------|-----|--------------------------------|------------------------|-------------------------|
|                                                                  |     | No<br>(n = 3,238,575)          | Yes<br>(n = 3,238,575) |                         |
| History of COVID-19 status<br>(hospitalisation, screening tests) | No  | 3,084,341 (95.2)               | 3,171,637 (97.9)       | -0.14884                |
|                                                                  | Yes | 154,234 (4.8)                  | 66,938 (2.1)           |                         |
| Influenza vaccines in 2018 or 2019                               | No  | 2,736,891 (84.5)               | 2,333,067 (72.0)       | 0.30589                 |
|                                                                  | Yes | 501,684 (15.5)                 | 905,508 (28.0)         |                         |
| Frailty                                                          | No  | 3,104,595 (95.9)               | 3,109,300 (96.0)       | -0.00736                |
|                                                                  | Yes | 133,980 (4.1)                  | 129,275 (4.0)          |                         |
| Alcohol-related conditions                                       | No  | 3,179,282 (98.2)               | 3,169,378 (97.9)       | 0.02193                 |
|                                                                  | Yes | 59,293 (1.8)                   | 69,197 (2.1)           |                         |
| <b>Cardiovascular risk factors</b>                               |     |                                |                        |                         |
| Smoking-related conditions                                       | No  | 3,059,369 (94.5)               | 3,005,702 (92.8)       | 0.06793                 |
|                                                                  | Yes | 179,206 (5.5)                  | 232,873 (7.2)          |                         |
| Hypertension                                                     | No  | 2,069,858 (63.9)               | 1,710,110 (52.8)       | 0.22678                 |
|                                                                  | Yes | 1,168,717 (36.1)               | 1,528,465 (47.2)       |                         |
| Diabetes mellitus                                                | No  | 2,867,919 (88.6)               | 2,660,795 (82.2)       | 0.18165                 |
|                                                                  | Yes | 370,656 (11.4)                 | 577,780 (17.8)         |                         |
| Dyslipidemia                                                     | No  | 2,537,120 (78.3)               | 2,221,268 (68.6)       | 0.22225                 |
|                                                                  | Yes | 701,455 (21.7)                 | 1,017,307 (31.4)       |                         |
| Obesity-related conditions                                       | No  | 3,189,786 (98.5)               | 3,158,190 (97.5)       | 0.06983                 |
|                                                                  | Yes | 48,789 (1.5)                   | 80,385 (2.5)           |                         |
| <b>Cardiovascular diseases</b>                                   |     |                                |                        |                         |
| Coronary heart disease                                           | No  | 3,058,810 (94.4)               | 2,974,074 (91.8)       | 0.10366                 |
|                                                                  | Yes | 179,765 (5.6)                  | 264,501 (8.2)          |                         |
| Heart failure                                                    | No  | 3,194,259 (98.6)               | 3,188,551 (98.5)       | 0.01471                 |
|                                                                  | Yes | 44,316 (1.4)                   | 50,024 (1.5)           |                         |
| Cardiac rhythm disorder                                          | No  | 3,129,934 (96.6)               | 3,098,837 (95.7)       | 0.05002                 |
|                                                                  | Yes | 108,641 (3.4)                  | 139,738 (4.3)          |                         |
| Valvular heart disease                                           | No  | 3,196,485 (98.7)               | 3,183,536 (98.3)       | 0.03290                 |
|                                                                  | Yes | 42,090 (1.3)                   | 55,039 (1.7)           |                         |
| Occlusive peripheral arterial disease                            | No  | 3,176,702 (98.1)               | 3,160,054 (97.6)       | 0.03531                 |
|                                                                  | Yes | 61,873 (1.9)                   | 78,521 (2.4)           |                         |
| Stroke                                                           | No  | 3,172,257 (98.0)               | 3,158,044 (97.5)       | 0.02949                 |
|                                                                  | Yes | 66,318 (2.0)                   | 80,531 (2.5)           |                         |

|                                |     | ChAdOx1 nCoV-19 vaccine |                        | Standardized difference |
|--------------------------------|-----|-------------------------|------------------------|-------------------------|
|                                |     | No<br>(n = 3,238,575)   | Yes<br>(n = 3,238,575) |                         |
| Pulmonary embolism             | No  | 3,227,404 (99.7)        | 3,227,202 (99.6)       | 0.00106                 |
|                                | Yes | 11,171 (0.3)            | 11,373 (0.4)           |                         |
| <b>Other comorbidities</b>     |     |                         |                        |                         |
| Chronic respiratory conditions | No  | 3,007,814 (92.9)        | 2,924,087 (90.3)       | 0.09321                 |
|                                | Yes | 230,761 (7.1)           | 314,488 (9.7)          |                         |
| Dialysis                       | No  | 3,236,927 (99.9)        | 3,238,270 (100)        | -0.02389                |
|                                | Yes | 1,648 (0.1)             | 305 (0.0)              |                         |
| Kidney transplant              | No  | 3,236,326 (99.9)        | 3,237,414 (100)        | -0.01465                |
|                                | Yes | 2,249 (0.1)             | 1,161 (0.0)            |                         |
| Liver failure                  | No  | 3,204,043 (98.9)        | 3,197,626 (98.7)       | 0.01846                 |
|                                | Yes | 34,532 (1.1)            | 40,949 (1.3)           |                         |
| Active cancer                  | No  | 3,134,610 (96.8)        | 3,113,654 (96.1)       | 0.03505                 |
|                                | Yes | 103,965 (3.2)           | 124,921 (3.9)          |                         |
| Depression                     | No  | 2,922,626 (90.2)        | 2,829,158 (87.4)       | 0.09162                 |
|                                | Yes | 315,949 (9.8)           | 409,417 (12.6)         |                         |
| Psychosis                      | No  | 3,192,075 (98.6)        | 3,183,030 (98.3)       | 0.02243                 |
|                                | Yes | 46,500 (1.4)            | 55,545 (1.7)           |                         |
| Dementia                       | No  | 3,219,223 (99.4)        | 3,222,392 (99.5)       | -0.01325                |
|                                | Yes | 19,352 (0.6)            | 16,183 (0.5)           |                         |
| Epilepsy                       | No  | 3,221,221 (99.5)        | 3,218,186 (99.4)       | 0.01231                 |
|                                | Yes | 17,354 (0.5)            | 20,389 (0.6)           |                         |
| Parkinson's disease            | No  | 3,220,652 (99.4)        | 3,215,420 (99.3)       | 0.02035                 |
|                                | Yes | 17,923 (0.6)            | 23,155 (0.7)           |                         |
| Inflammatory bowel disease     | No  | 3,222,669 (99.5)        | 3,218,228 (99.4)       | 0.01838                 |
|                                | Yes | 15,906 (0.5)            | 20,347 (0.6)           |                         |
| Rheumatoid arthritis           | No  | 3,214,589 (99.3)        | 3,209,931 (99.1)       | 0.01602                 |
|                                | Yes | 23,986 (0.7)            | 28,644 (0.9)           |                         |
| Ankylosing spondylitis         | No  | 3,222,878 (99.5)        | 3,217,156 (99.3)       | 0.02341                 |
|                                | Yes | 15,697 (0.5)            | 21,419 (0.7)           |                         |

**Table 5. Description of vaccine products for the first and second doses**

|                                            | Vaccine product: first dose (n, %) |                |                  | Total             |
|--------------------------------------------|------------------------------------|----------------|------------------|-------------------|
|                                            | BNT162b2                           | mRNA-1273      | ChAdOx1 nCoV-19  |                   |
| <b>Vaccine product: second dose (n, %)</b> |                                    |                |                  |                   |
| BNT162b2                                   | 6,894,688                          | 2,766          | 252,570          | 7,150,024         |
|                                            | <b>96.27</b>                       | 0.32           | 7.80             |                   |
| mRNA-1273                                  | 2,169                              | 820,322        | 66,917           | 889,408           |
|                                            | 0.03                               | <b>95.77</b>   | 2.07             |                   |
| ChAdOx1 nCoV-19                            | 0                                  | 0              | 2,802,944        | 2,802,944         |
|                                            | 0                                  | 0              | <b>86.55</b>     |                   |
| Ad26.COV2.S                                | 212                                | 34             | 808              | 1,054             |
|                                            | 0                                  | 0              | 0.02             |                   |
| <i>Receiving only one dose</i>             | 264,589                            | 33,477         | 115,336          | 413,402           |
|                                            | 3.69                               | 3.91           | 3.56             |                   |
| <b>Total</b>                               | <b>7,161,658</b>                   | <b>856,599</b> | <b>3,238,575</b> | <b>11,256,832</b> |

**Table 6. Two-dose vaccine effectiveness against COVID-19-related hospitalisation after excluding individuals who received different vaccine products between the first and second doses and their matched controls**

| Vaccine product | Vaccination status | n(hosp)/N(group) (%) | Median follow-up [IQR] | Model 1* HR (95% CI) | Model 2† Adjusted HR (95% CI) | Vaccine effectiveness (%) (95% CI) |
|-----------------|--------------------|----------------------|------------------------|----------------------|-------------------------------|------------------------------------|
| BNT162b2        | No                 | 8250/3701379 (0.22%) | 62 [25 - 98]           | 1                    | 1                             | -                                  |
|                 | Yes                | 810/3701379 (0.02%)  | 62 [25 - 98]           | 0.10 (0.09 - 0.10)   | 0.09 (0.08 - 0.09)            | 91% (91 to 92)                     |
| mRNA-1273       | No                 | 831/425555 (0.2%)    | 63 [25 - 98]           | 1                    | 1                             | -                                  |
|                 | Yes                | 48/425555 (0.01%)    | 64 [25 - 98]           | 0.06 (0.04 - 0.08)   | 0.05 (0.04 - 0.07)            | 95% (93 to 96)                     |
| ChAdOx1 nCoV-19 | No                 | 542/878639 (0.06%)   | 43 [27 - 61]           | 1                    | 1                             | -                                  |
|                 | Yes                | 60/878639 (0.01%)    | 43 [27 - 61]           | 0.11 (0.08 - 0.14)   | 0.09 (0.07 - 0.12)            | 91% (88 to 93)                     |

IQR: interquartile range; HR: hazard ratio; CI: confidence interval.

\*Model 1: adjusted for matching variables (age, sex, region of residence, nursing home status)

†Model 2: Model 1 with further adjustment for social deprivation index, history of positive COVID-19 status, history of influenza vaccination, frailty, alcohol-related conditions, smoking-related conditions, hypertension, diabetes mellitus, dyslipidemia, obesity-related conditions, coronary heart disease, heart failure, cardiac rhythm disorder, valvular heart disease, occlusive peripheral arterial disease, stroke, pulmonary embolism, chronic respiratory conditions, dialysis, kidney transplant, liver failure, active cancer, depression, psychosis, dementia, epilepsy, Parkinson's disease, inflammatory bowel disease, rheumatoid arthritis, ankylosing spondylitis.



**Table 7. Two-dose vaccine effectiveness against COVID-19-related hospitalisation by age categories**

| Age categories (years) | Vaccine product | Vaccination status | n(hosp)/N(group) (%) | Median follow-up [IQR] | Model 1* HR (95% CI) | Model 2† Adjusted HR (95% CI) | Vaccine effectiveness (%) (95% CI) |
|------------------------|-----------------|--------------------|----------------------|------------------------|----------------------|-------------------------------|------------------------------------|
| 50-64                  | BNT162b2        | No                 | 890/964839 (0.09%)   | 59 [30 - 81]           | 1                    | 1                             | -                                  |
|                        |                 | Yes                | 91/964839 (0.01%)    | 59 [30 - 81]           | 0.10 (0.08 to 0.13)  | 0.07 (0.06 to 0.09)           | 93% (91 to 94)                     |
|                        | mRNA-1273       | No                 | 97/128756 (0.08%)    | 59 [26 - 83]           | 1                    | 1                             | -                                  |
|                        |                 | Yes                | 15/128756 (0.01%)    | 59 [26 - 83]           | 0.15 (0.09 to 0.27)  | 0.11 (0.06 to 0.20)           | 89% (80 to 94)                     |
|                        | ChAdOx1 nCoV-19 | No                 | 321/554588 (0.06%)   | 42 [24 - 62]           | 1                    | 1                             | -                                  |
|                        |                 | Yes                | 17/554588 (0%)       | 42 [24 - 62]           | 0.05 (0.03 to 0.09)  | 0.04 (0.02 to 0.07)           | 96% (93 to 98)                     |
| 65-74                  | BNT162b2        | No                 | 1298/1085149 (0.12%) | 63 [29 - 88]           | 1                    | 1                             | -                                  |
|                        |                 | Yes                | 106/1085149 (0.01%)  | 64 [29 - 88]           | 0.08 (0.07 to 0.10)  | 0.06 (0.05 to 0.07)           | 94% (93 to 95)                     |
|                        | mRNA-1273       | No                 | 138/137694 (0.1%)    | 64 [27 - 92]           | 1                    | 1                             | -                                  |
|                        |                 | Yes                | 6/137694 (0%)        | 64 [27 - 92]           | 0.04 (0.02 to 0.10)  | 0.03 (0.01 to 0.07)           | 97% (93 to 99)                     |
|                        | ChAdOx1 nCoV-19 | No                 | 240/382312 (0.06%)   | 44 [29 - 60]           | 1                    | 1                             | -                                  |
|                        |                 | Yes                | 31/382312 (0.01%)    | 44 [29 - 60]           | 0.13 (0.09 to 0.19)  | 0.11 (0.08 to 0.17)           | 89% (83 to 92)                     |
| 75-84                  | BNT162b2        | No                 | 3141/995104 (0.32%)  | 56 [19 - 114]          | 1                    | 1                             | -                                  |
|                        |                 | Yes                | 221/995104 (0.02%)   | 57 [19 - 114]          | 0.07 (0.06 to 0.08)  | 0.05 (0.04 to 0.06)           | 95% (94 to 96)                     |
|                        | mRNA-1273       | No                 | 313/95893 (0.33%)    | 67 [20 - 114]          | 1                    | 1                             | -                                  |
|                        |                 | Yes                | 8/95893 (0.01%)      | 69 [20 - 114]          | 0.02 (0.01 to 0.05)  | 0.02 (0.01 to 0.04)           | 98% (96 to 99)                     |
|                        | ChAdOx1 nCoV-19 | No                 | 31/35292 (0.09%)     | 55 [39 - 67]           | 1                    | 1                             | -                                  |
|                        |                 | Yes                | 8/35292 (0.02%)      | 55 [39 - 67]           | 0.26 (0.12 to 0.56)  | 0.20 (0.09 to 0.48)           | 80% (52 to 91)                     |
| ≥85                    | BNT162b2        | No                 | 2921/657006 (0.44%)  | 83 [27 - 118]          | 1                    | 1                             | -                                  |
|                        |                 | Yes                | 392/657006 (0.06%)   | 86 [27 - 119]          | 0.13 (0.12 to 0.14)  | 0.10 (0.09 to 0.11)           | 90% (89 to 91)                     |
|                        | mRNA-1273       | No                 | 283/64274 (0.44%)    | 92 [28 - 115]          | 1                    | 1                             | -                                  |

| Age categories (years) | Vaccine product | Vaccination status | n(hosp)/N(group) (%) | Median follow-up [IQR] | Model 1* HR (95% CI) | Model 2† Adjusted HR (95% CI) | Vaccine effectiveness (%) (95% CI) |
|------------------------|-----------------|--------------------|----------------------|------------------------|----------------------|-------------------------------|------------------------------------|
|                        |                 | Yes                | 19/64274 (0.03%)     | 94 [29 - 116]          | 0.06 (0.04 to 0.10)  | 0.05 (0.03 to 0.08)           | 95% (92 to 97)                     |

IQR: interquartile range; HR: hazard ratio; CI: confidence interval.

\*Model 1: adjusted for matching variables (age, sex, region of residence, nursing home status)

†Model 2: Model 1 with further adjustment for social deprivation index, history of positive COVID-19 status, history of influenza vaccination, frailty, alcohol-related conditions, smoking-related conditions, hypertension, diabetes mellitus, dyslipidemia, obesity-related conditions, coronary heart disease, heart failure, cardiac rhythm disorder, valvular heart disease, occlusive peripheral arterial disease, stroke, pulmonary embolism, chronic respiratory conditions, dialysis, kidney transplant, liver failure, active cancer, depression, psychosis, dementia, epilepsy, Parkinson's disease, inflammatory bowel disease, rheumatoid arthritis, ankylosing spondylitis.

**Table 8. Two-dose vaccine effectiveness against COVID-19-related hospitalisation by sex**

| Sex   | Vaccine product | Vaccination status | n(hosp)/N(group) (%) | Median follow-up [IQR] | Model 1*<br>HR (95% CI) | Model 2†<br>Adjusted HR (95% CI) | Vaccine effectiveness (%) (95% CI) |
|-------|-----------------|--------------------|----------------------|------------------------|-------------------------|----------------------------------|------------------------------------|
| Men   | BNT162b2        | No                 | 3927/1575121 (0.25%) | 60 [24 - 96]           | 1                       | 1                                | -                                  |
|       |                 | Yes                | 433/1575121 (0.03%)  | 61 [24 - 98]           | 0.11 (0.10 to 0.12)     | 0.09 (0.08 to 0.10)              | 91% (90 to 92)                     |
|       | mRNA-1273       | No                 | 391/184286 (0.21%)   | 62 [24 - 98]           | 1                       | 1                                | -                                  |
|       |                 | Yes                | 27/184286 (0.01%)    | 63 [24 - 98]           | 0.07 (0.05 to 0.10)     | 0.06 (0.04 to 0.09)              | 94% (91 to 96)                     |
|       | ChAdOx1 nCoV-19 | No                 | 364/514618 (0.07%)   | 43 [27 - 62]           | 1                       | 1                                | -                                  |
|       |                 | Yes                | 40/514618 (0.01%)    | 43 [27 - 62]           | 0.11 (0.08 to 0.15)     | 0.09 (0.07 to 0.13)              | 91% (87 to 93)                     |
| Women | BNT162b2        | No                 | 4323/2126977 (0.2%)  | 63 [26 - 98]           | 1                       | 1                                | -                                  |
|       |                 | Yes                | 377/2126977 (0.02%)  | 63 [26 - 99]           | 0.09 (0.08 to 0.10)     | 0.08 (0.07 to 0.09)              | 92% (91 to 93)                     |
|       | mRNA-1273       | No                 | 440/242331 (0.18%)   | 64 [25 - 98]           | 1                       | 1                                | -                                  |
|       |                 | Yes                | 21/242331 (0.01%)    | 64 [25 - 99]           | 0.05 (0.03 to 0.07)     | 0.04 (0.03 to 0.07)              | 96% (93 to 97)                     |
|       | ChAdOx1 nCoV-19 | No                 | 253/487158 (0.05%)   | 44 [27 - 62]           | 1                       | 1                                | -                                  |
|       |                 | Yes                | 22/487158 (0%)       | 44 [27 - 62]           | 0.09 (0.06 to 0.13)     | 0.08 (0.05 to 0.12)              | 92% (88 to 95)                     |

IQR: interquartile range; HR: hazard ratio; CI: confidence interval.

\*Model 1: adjusted for matching variables (age, sex, region of residence, nursing home status)

†Model 2: Model 1 with further adjustment for social deprivation index, history of positive COVID-19 status, history of influenza vaccination, frailty, alcohol-related conditions, smoking-related conditions, hypertension, diabetes mellitus, dyslipidemia, obesity-related conditions, coronary heart disease, heart failure, cardiac rhythm disorder, valvular heart disease, occlusive peripheral arterial disease, stroke, pulmonary embolism, chronic respiratory conditions, dialysis, kidney transplant, liver failure, active cancer, depression, psychosis, dementia, epilepsy, Parkinson's disease, inflammatory bowel disease, rheumatoid arthritis, ankylosing spondylitis.

**Figure 1. Surveillance of SARS-CoV-2 variants in France**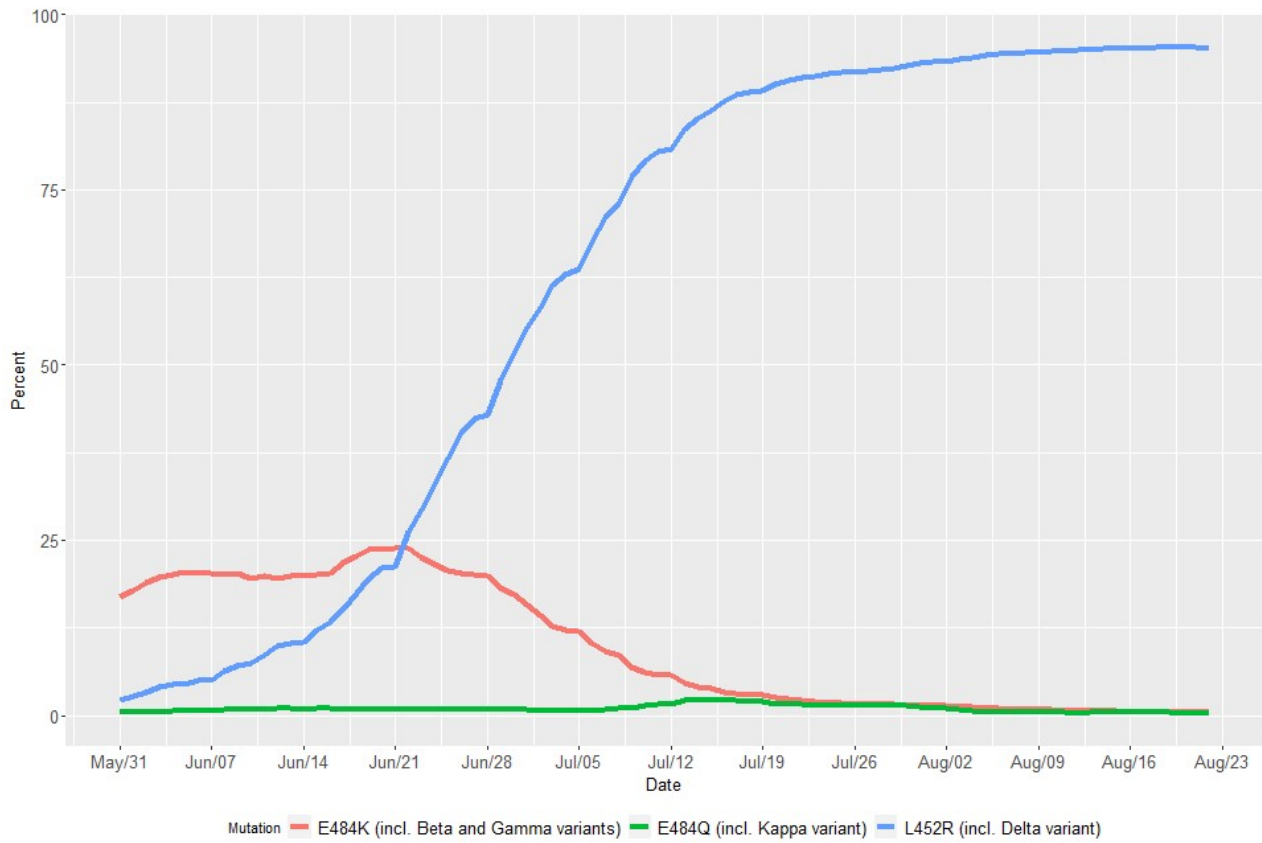

Information on variants of SARS-CoV-2 has been collected in the SI-DEP database. Aggregated data are made available by the National Public Health Agency (*Santé Publique France*) in the website [www.data.gouv.fr/fr/datasets/donnees-de-laboratoires-pour-le-depistage-indicateurs-sur-les-mutations](http://www.data.gouv.fr/fr/datasets/donnees-de-laboratoires-pour-le-depistage-indicateurs-sur-les-mutations).
